# Supplementary material for: Canonical WNT signaling-dependent gating of MYC requires a noncanonical CTCF function at a distal binding site
Source: PubMed Central journal article supplement (PMC8752836; doi:10.1038/s41467-021-27868-3), 2022-01-11
Supplement: 41467_2021_27868_MOESM1_ESM.pdf [file 41467_2021_27868_MOESM1_ESM.pdf]

## Supplementary Figures and Table

### Canonical WNT signaling-dependent gating of *MYC* requires a non-canonical CTCF function at a distal binding site

Ilyas Chachoua, Ilias Tzelepis, Hao Dai, Jia-Pei Lim, Anna Lewandowska-Ronnegren, Felipe Beccaria Casagrande, Shuangyang Wu, Johanna Vestlund, Carolina Diettrich Mallet de Lima, Deeksha Bhartiya, Barbara Scholz, Mirco Martino, Rashid Mehmood and Anita Göndör

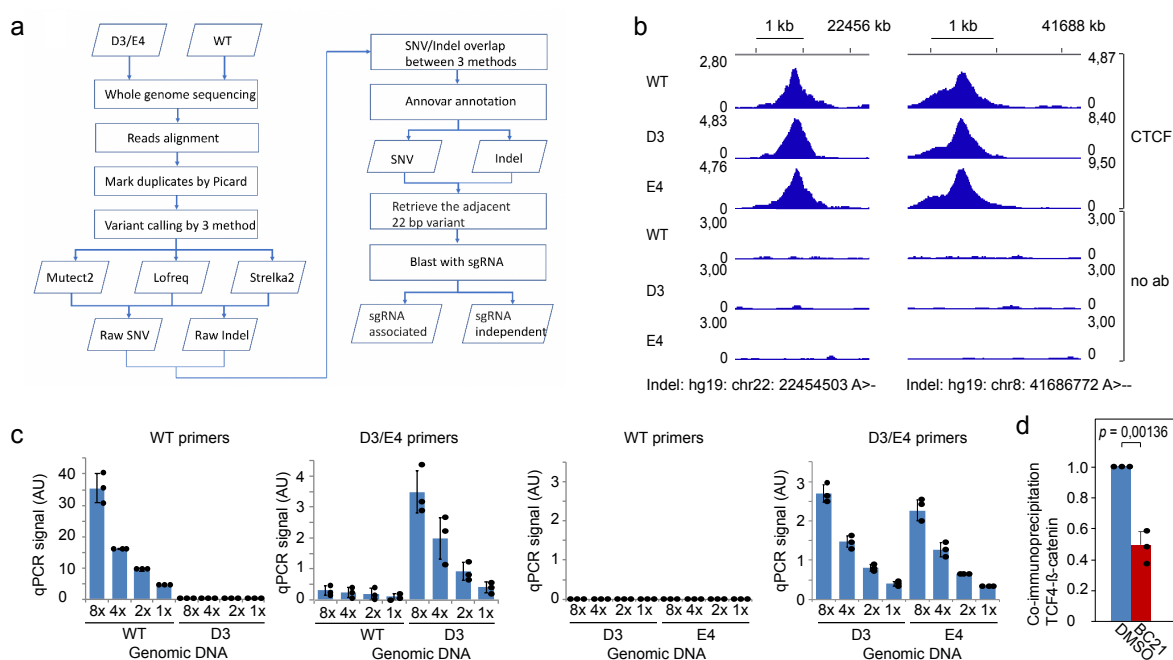

**Supplementary Figure 1. Characterization of the D3 and E4 cell clones.** a) Off-target detection pipeline modified from the GOT1 method<sup>22</sup>. b) The distribution of two indels common to both D3 and E4 cells and close to CTCFBSs overlaid in ChIP-seq data (average of three independent samples). In both cases, the indels are positioned in the flank of the CTCFBSs. c) Titration of the allele-specific qPCR analyses to quantitatively discriminate between the WT and the D3 alleles using primers specific for either the WT or the mutant CTCFBSs (D3 and E4), respectively. d) Co immunoprecipitation analyses

of physical interactions between TCF4 and  $\beta$ -catenin in the presence or absence of BC21. The data are normalized to the DMSO control. The bars in panels c and d represent the average of three independent samples with standard deviation. The  $p$  values were calculated by the two tailed Student's t-test.

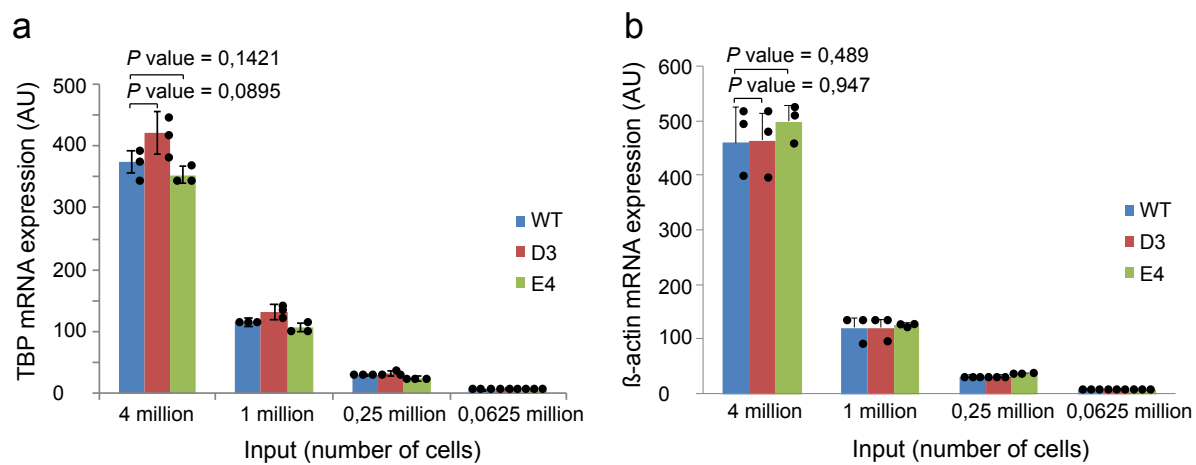

**Supplementary Figure 2. Comparisons of TBP (a) and  $\beta$ -actin (b) mRNA expression in relation to the input number of cells.** The bars in panels a and b represent the average of three independent samples with standard deviation. The  $p$  values were calculated by the two tailed Student's t-test.

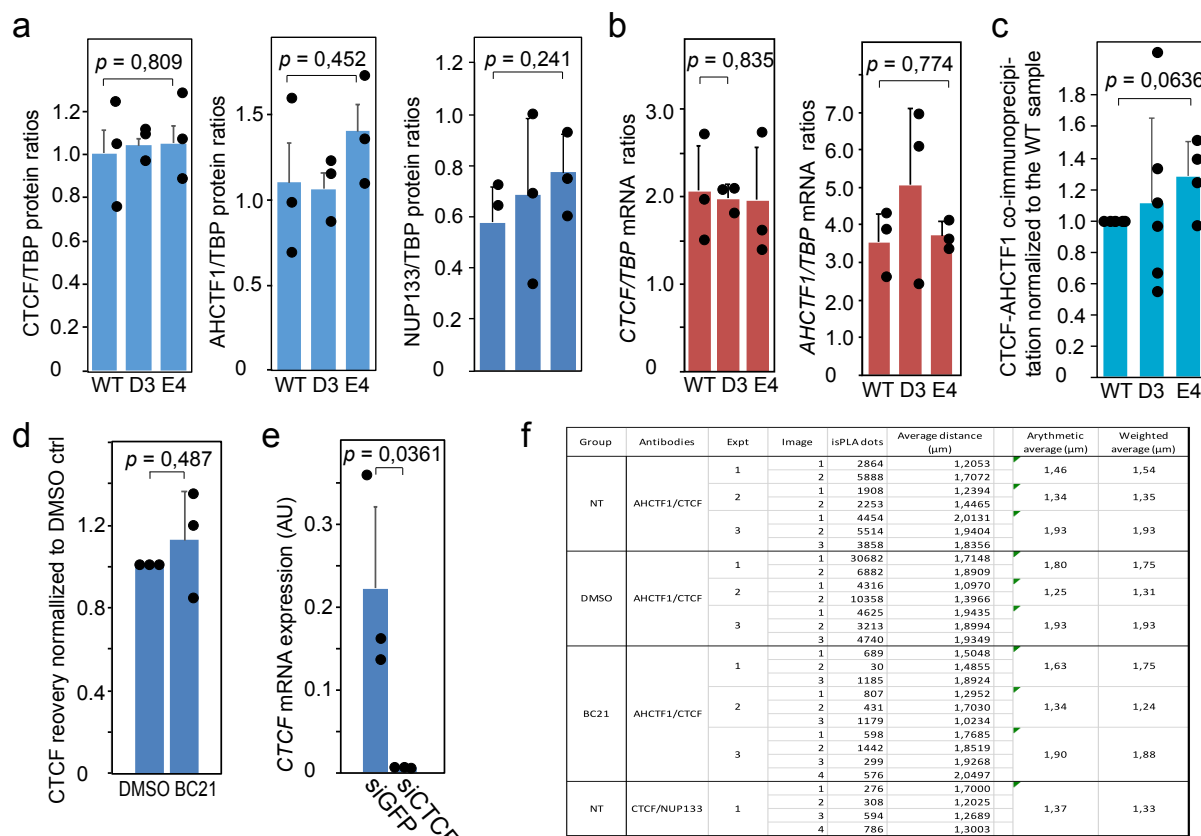

**Supplementary Figure 3. Comparisons of the levels of AHCTF1 and CTCF expression/interactions in WT HCT-116, D3 and E4 cells.** The relative expression levels of CTCF, AHCTF1 and NUP133 protein (a) or CTCF and AHCTF1 mRNA (b) in WT HCT-116, D3 and E4 cells were normalized to TBP expression. c) Relative difference in the recovery of CTCF-AHCTF1 co-immunoprecipitations in D3 and E4 cells normalized to the recovery of WT HCT-116 data. d) ChIP analyses of CTCF occupancy at the *CCAT1*-specific CTCFBS in control (DMSO) and BC21-treated WT HCT-116 cells. e) Efficiency of siRNA knockdown of CTCF mRNA expression. f) The average distribution of the CTCF-AHCTF1 and CTCF-NUP133 ISPLA signals in relation to the nuclear periphery. The bars in panels a-e represent the average of at least three independent samples with standard deviation. The  $p$  values were calculated by the two tailed Student's t-test.

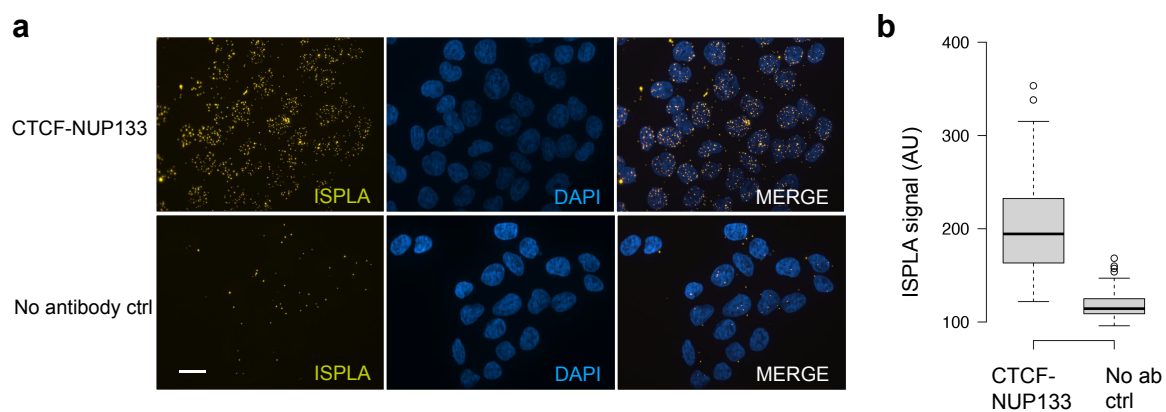

**Supplementary Figure 4. *In situ* proximity analyses between CTCF and NUP133 in WT HCT-116 cells.**

a) Extended view images of the signals generated by the NUP133-CTCF ISPLA reaction. No ab ctrl = ISPLA performed in the absence of primary antibodies. Bar = 10 micrometer. b) The quantitation of the ISPLA signals representing the sum of two independent experiments was done as has been described previously<sup>7</sup>. Box-and-whisker plots show median values, interquartile ranges and Tukey whiskers.

**a** hg19:chr8:128227230-128227453

CTCF Motif TCF4 motif

AATTCATCTTATTTTCATTTAAGACAACCAACTGGGCT  
 AGTTAGAGCCGAGATTTGAGCCAGTTTTTCTCACTG  
 ACTCTAAAACCTATCCATGCTCCTAACCTCCTCACCA  
 TTGGAGGGCATTGCTGTTTACCCTTTCAGTTTCAGCTG  
 TACTATCAAAGCAGCAAATCAAGGGCAGGGACCACAG  
 CTTGACCTTAACTATTCAACTGCACCTTAATTACC

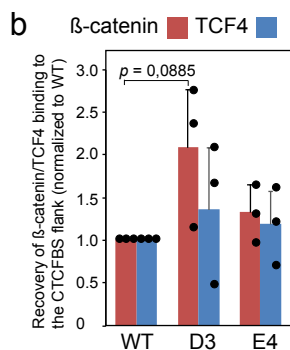

**Supplementary Figure 5.  $\beta$ -catenin and TCF4 binding to the *CCAT1*-specific CTCFBS region.** a) The distribution of TCF4 binding motifs (marked in green) in the regions flanking the *CCAT1*-specific CTCFBS (marked in orange). b) CHIP analyses of  $\beta$ -catenin and TCF4 binding to the *CCAT1*-specific CTCFBS region in WT HCT-116, D3 and E4 cells. The bars show in all instances the average of three independent experiments with indicated standard deviation. The  $p$  values were calculated by the two tailed Student's t-test.

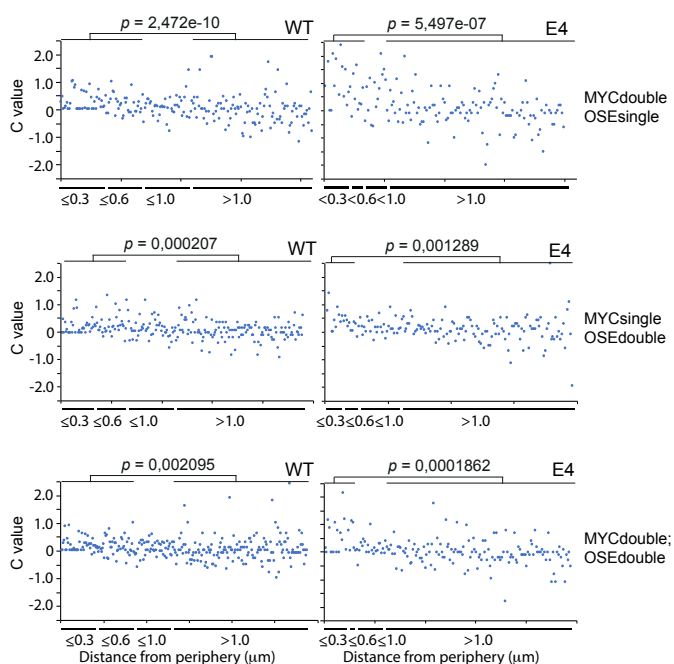

**Supplementary Figure 6. The OSE-specific CTCFBS influences the proximity between the OSE, MYC and the nuclear periphery.** Analysis of the “c” value (scoring for the difference in the proximity of the OSE and MYC to the nuclear periphery) in relation to the proximity between the OSE and the nuclear periphery in control and mutant HCT-116 cells for replicated alleles (MYCdouble/OSEsingle; MYCsingle/OSEdouble; MYCdouble/OSEdouble) (see **Fig. 5a and b** for additional information). A total of 1085 (Ctrl) and 740 (E4) alleles were counted from two independent experiments (*P* values: Two-sided KS test).

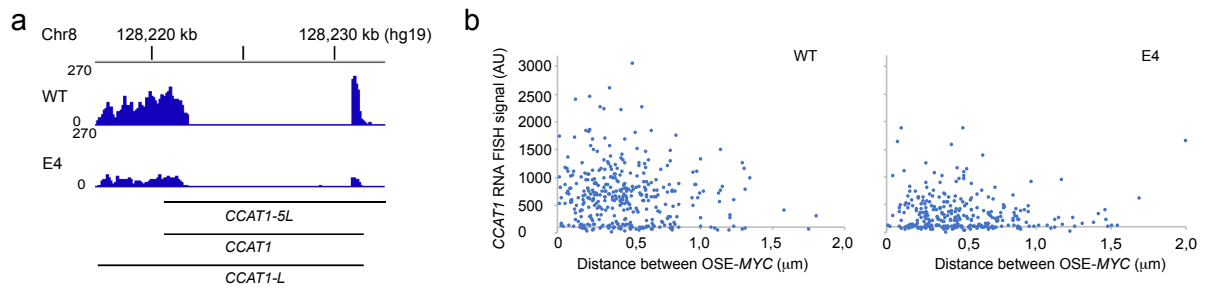

**Supplementary Figure 7. *CCAT1* eRNA and *MYC* trafficking.** a) Map (hg19) of *CCAT1* eRNA expression in WT and mutant (E4) HCT-116 cells. The y axes indicate the number of normalized reads. The previously reported<sup>14,15</sup> *CCAT1* eRNA variants are indicated. b) 3D DNA FISH analyses of the proximity between the OSE and *MYC* plotted against *CCAT1* eRNA FISH signals in WT HCT-116 cells and the E4 clone.



Supplementary Table I

| Locus                 | qPCR primers for ChIP    |                         | Cycle                                     |
|-----------------------|--------------------------|-------------------------|-------------------------------------------|
|                       | Forward                  | Reverse                 |                                           |
| <i>MYC</i> promoter   | CCCACGGCCCTTTATAATGCGA   | ATACTCAGCGGATCCCTCCCT   | 95 °C, 5m                                 |
| CTCFBS                | AGAGCCGAGATTTGAGCCCAGT   | GGTCCCTGCCCTTGATTTGCTG  | 95 °C, 30 s; 65 °C, 30 s; 72 °C, 30s      |
| <i>H19</i> ICR        | ATGAGCGTCTATTCCAGA       | CTCACACATCACAGCCCAAG    | x 36                                      |
| <i>CCAT1</i> promoter | CCTCAGTGGTCCCATCACACTAA  | CGTGGCAATTACCATGGTCTTGC |                                           |
| CTCF negative site    | CCCAACATTGAGCCTCTGA      | GGGCTGTCTCCACCTCTGA     |                                           |
| Mut_seq (D3, E4)      | CTAAACCTCTTATTATTTATTTCA | TAGTTTAAAGTCAAGCTGTG    | 95 °C, 30 s; 53 °C, 30 s; 72 °C, 30s x 36 |
| Mut_seq WT            | CCTAAACCTCTCACCATTGGA    | AGAGTGAGGGGACATCCTGTAT  | 95 °C, 30 s; 60 °C, 30 s; 72 °C, 30s x 36 |
| TCF4                  | TAAATTTGCTGCTGGTGCTG     | GGGGTTTTGAAAGACACAA     | *95 °C, 30 s; 65 °C, 30 s; 72 °C, 30 s    |

| Primer ID         | PCR primers for DNA FISH and RNA FISH |                      | Cycle                                  |
|-------------------|---------------------------------------|----------------------|----------------------------------------|
|                   | Forward                               | Reverse              |                                        |
| <i>MYC</i> F1, R1 | AAGGAACCGCCTGTCTTCC                   | CGATCCCTCCCTCCGTTCTT |                                        |
| <i>MYC</i> F2, R2 | CCGGTTTTCGGGGCTTTATC                  | TCCGGTTCGCAGATGA     | 94 °C, 2 m                             |
| <i>MYC</i> F3, R3 | TGTATGTGGAGCGGCTTCTCG                 | CAGCCAAGTTGTGAGGTTG  | 94 °C, 15 s; 60 °C, 15 s; 68 °C, 2-3 m |
| <i>MYC</i> F4, R4 | TGCATGATCAAATGCAACCTCA                | CTTCTTCCAGGAGCCGTCA  | x 34                                   |
| SupE F1, R1       | GGCACTTCACACGGATTGCTC                 | CACTGCACACGGGAAATGCT |                                        |
| SupE F2, R2       | TTTTTCCGGGCTTTGAAAGAT                 | CTACCCAAGCTCCCTCAGC  |                                        |

| Primer ID           | PCR primers for total RNA and RNA export assay |                      | Cycle                                 |
|---------------------|------------------------------------------------|----------------------|---------------------------------------|
|                     | Forward                                        | Reverse              |                                       |
| <i>MYC</i>          | TACAACACCCGAGCAAGGAC                           | TTCTCCTCCTCGTCGAGTA  | 95 °C, 5 min                          |
| <i>MYC</i> intron 1 | CGCTGGAAACCTTGACCTC                            | CGATCCCTCCCTCCGTTCTT | 95 °C, 30 s; 65 °C, 30 s; 72 °C, 30 s |
| <i>CytB</i>         | CCGGTTTTCGGGGCTTTATC                           | TCCGGTTCGCAGATGA     | x 36                                  |
| <i>TBP</i>          | TTCCGCTGGCCATAGTGAT                            | TGCTGCTGCCTTTGTTGCTC |                                       |
| <i>b-Actin</i>      | CGTCCAGTTGGTGACGATG                            | CCGTGCTCAGGGCTTCTTGT |                                       |
| <i>ERCC-113</i>     | GCGACCAACATCGTTACG                             | CCGCGCTGAGCACTT      |                                       |
| <i>CCAT1</i>        | CATTGGGAAAGGTGCCGAG                            | ACGTTAGCCATACAGAGCC  |                                       |
| <i>FAM49B</i>       | GGGGTGCAGTTGTTCCACTA                           | CTCGCTAGATGCTGGGTG   |                                       |
| <i>CTCF</i>         | TTGTGCAAGTTATGCCAGCAG                          | CACTTGGGTAAACCGAGCA  |                                       |
| <i>AHCTF1</i>       | TCAGAAAGTCCGGCAACAA                            | CGCCACAGCTTCTTCACTA  |                                       |

| CRISPR oligonucleotides |                                                                                                 |
|-------------------------|-------------------------------------------------------------------------------------------------|
| guide RNA sequence      | UAAACAGCAAUGCCCUCAA                                                                             |
| Donor DNA sequence      | TTCTCACTGACTCTAAACCTATCCATGCTCCTAAACCTCTTATTATTTATTTTCATGCTGTTACCCCTTCAGTTTCAGCTGTACTATCAAAGCAG |
