# Supplementary material for: Canonical WNT signaling-dependent gating of MYC requires a noncanonical CTCF function at a distal binding site
Source: PubMed Central journal article supplement (PMC8752836; doi:10.1038/s41467-021-27868-3), 2022-01-11
Supplement: 41467_2021_27868_MOESM3_ESM.pdf [file 41467_2021_27868_MOESM3_ESM.pdf]

## Reporting Summary

Nature Research wishes to improve the reproducibility of the work that we publish. This form provides structure for consistency and transparency in reporting. For further information on Nature Research policies, see our [Editorial Policies](#) and the [Editorial Policy Checklist](#).

### Statistics

For all statistical analyses, confirm that the following items are present in the figure legend, table legend, main text, or Methods section.

n/a Confirmed

- The exact sample size ( $n$ ) for each experimental group/condition, given as a discrete number and unit of measurement
- A statement on whether measurements were taken from distinct samples or whether the same sample was measured repeatedly
- The statistical test(s) used AND whether they are one- or two-sided  
*Only common tests should be described solely by name; describe more complex techniques in the Methods section.*
- A description of all covariates tested
- A description of any assumptions or corrections, such as tests of normality and adjustment for multiple comparisons
- A full description of the statistical parameters including central tendency (e.g. means) or other basic estimates (e.g. regression coefficient) AND variation (e.g. standard deviation) or associated estimates of uncertainty (e.g. confidence intervals)
- For null hypothesis testing, the test statistic (e.g.  $F$ ,  $t$ ,  $r$ ) with confidence intervals, effect sizes, degrees of freedom and  $P$  value noted  
*Give  $P$  values as exact values whenever suitable.*
- For Bayesian analysis, information on the choice of priors and Markov chain Monte Carlo settings
- For hierarchical and complex designs, identification of the appropriate level for tests and full reporting of outcomes
- Estimates of effect sizes (e.g. Cohen's  $d$ , Pearson's  $r$ ), indicating how they were calculated

*Our web collection on [statistics for biologists](#) contains articles on many of the points above.*

### Software and code

Policy information about [availability of computer code](#)

Data collection

No software was used for data collection

Data analysis

The pipeline used to map the chromatin networks by Nodewalk analyses is available on request. The simulation of the kinetics of mRNA export used an in-house code, which has been published (ref nr 7 in the manuscript).

RNA-seq library construction was performed with standard Illumina TruSeq Stranded mRNA kit with Poly-A selection and samples were sequenced on NovaSeq6000 (NovaSeq Control Software 1.7.0/RTA v3.4.4) with a 51nt(Read1)-10nt(Index1)-10nt(Index2)-51nt(Read2) setup using 'NovaSeqStandard' workflow in 'SP' mode flowcell. Data analysis was performed by nf-core RNA-seq pipeline (v.3.0) with default parameter. In brief, adapters and low quality reads were filtered by trimgalore (0.6.6) [<https://github.com/FelixKrueger/TrimGalore>]. Clean reads were aligned to the GRCh37 human reference genome and ERCC RNA spike-in fasta (<https://www.thermofisher.com/se/en/home.html>) with hisat2(2.2.0). Genome-wide coverage output in BEDGRAPH format were generated by Bedtools genomecov subcommand (V 2.29.2). Bamcoverage from Deeptools (3.5.1) was to create bigWig coverage files. Integrative Genomics Viewer was used to view the read coverage.

Genome wide off-target sequencing was analyzed according to a modified method of GOT1. Briefly, low-quality reads and adapter were trimmed by Trimmomatic. BWA was subsequently used to align clean reads to the genome and Picard (<https://broadinstitute.github.io/picard/>) was used to mark duplicates. To reduce the false positive rate, we applied 3 methods to detect the SNV and Indel between D3/E4 and WT, mutect2, Strelka2 and Lofreq. The overlapping SNVs and Indels were treated as true variants that were further annotated by Annovar. The adjacent 22-bp sequences of the off-target variants were retrieved from the mapping files and blasted with the 22bp sgRNA (19bp sgRNA target sequence and 3bp PAM). High sequence similarities indicated that the off-target variants were sgRNA-associated, while low sequence similarity meant sgRNA-independence. To further screen for potential off-target sites that overlapped with the identified variant we used Cas-OffFinder (<http://www.rgenome.net/cas-offfinder/>).

For manuscripts utilizing custom algorithms or software that are central to the research but not yet described in published literature, software must be made available to editors and reviewers. We strongly encourage code deposition in a community repository (e.g. GitHub). See the Nature Research [guidelines for submitting code & software](#) for further information.

## Data

Policy information about [availability of data](#)

All manuscripts must include a [data availability statement](#). This statement should provide the following information, where applicable:

- Accession codes, unique identifiers, or web links for publicly available datasets
- A list of figures that have associated raw data
- A description of any restrictions on data availability

### Data availability

The genomic data reported in this paper has been deposited to general databases with the following accession numbers: For genomic sequences SRA accession nr: PRJNA756713, for ChIP-seq GEO accession nr: GSE184106 and for RNA-seq data GEO accession nr: GSE184103. The source data underlying Figures 1B,D, and E; 2B-I, K; 5B-F; 6C-F, Extended Figures 1A-C; 3A-D and G; 5 and 6 are provided in the Source Data file. All other relevant data supporting the key findings of this study are available within the article and its Supplementary Information files or from the corresponding author upon reasonable request.

## Field-specific reporting

Please select the one below that is the best fit for your research. If you are not sure, read the appropriate sections before making your selection.

- Life sciences       Behavioural & social sciences       Ecological, evolutionary & environmental sciences

For a reference copy of the document with all sections, see [nature.com/documents/nr-reporting-summary-flat.pdf](https://nature.com/documents/nr-reporting-summary-flat.pdf)

## Life sciences study design

All studies must disclose on these points even when the disclosure is negative.

|                 |                                                                                                                                                                                                                                                                                                                                                                                                                                                                      |
|-----------------|----------------------------------------------------------------------------------------------------------------------------------------------------------------------------------------------------------------------------------------------------------------------------------------------------------------------------------------------------------------------------------------------------------------------------------------------------------------------|
| Sample size     | The ChIP-qPCR/ChIP-seq, Nodewalk and RT-qPCR results represent in all cases three independent experiments to enable statistical analyses. Microscopic analyses were performed at least twice and in some instances in three independent experiments. These sample sizes, producing large data sets for the microscopic analyses, are commonly accepted in the community and suitable for statistical analyses comparing distribution of alleles within a population. |
| Data exclusions | No data was excluded                                                                                                                                                                                                                                                                                                                                                                                                                                                 |
| Replication     | All the independent experiments were performed on three or more separate occasions using different cell preparations                                                                                                                                                                                                                                                                                                                                                 |
| Randomization   | This is not applicable as the report does not contain any prognostic or predictive information                                                                                                                                                                                                                                                                                                                                                                       |
| Blinding        | This is not applicable as the report does not contain any prognostic or predictive information                                                                                                                                                                                                                                                                                                                                                                       |

## Reporting for specific materials, systems and methods

We require information from authors about some types of materials, experimental systems and methods used in many studies. Here, indicate whether each material, system or method listed is relevant to your study. If you are not sure if a list item applies to your research, read the appropriate section before selecting a response.

### Materials & experimental systems

| n/a                                 | Involved in the study                                     |
|-------------------------------------|-----------------------------------------------------------|
| <input type="checkbox"/>            | <input checked="" type="checkbox"/> Antibodies            |
| <input type="checkbox"/>            | <input checked="" type="checkbox"/> Eukaryotic cell lines |
| <input checked="" type="checkbox"/> | <input type="checkbox"/> Palaeontology and archaeology    |
| <input checked="" type="checkbox"/> | <input type="checkbox"/> Animals and other organisms      |
| <input checked="" type="checkbox"/> | <input type="checkbox"/> Human research participants      |
| <input checked="" type="checkbox"/> | <input type="checkbox"/> Clinical data                    |
| <input checked="" type="checkbox"/> | <input type="checkbox"/> Dual use research of concern     |

### Methods

| n/a                                 | Involved in the study                           |
|-------------------------------------|-------------------------------------------------|
| <input type="checkbox"/>            | <input checked="" type="checkbox"/> ChIP-seq    |
| <input checked="" type="checkbox"/> | <input type="checkbox"/> Flow cytometry         |
| <input checked="" type="checkbox"/> | <input type="checkbox"/> MRI-based neuroimaging |

## Antibodies

Antibodies used

Rabbit anti-NUP133 (Abcam, ab155990)  
 Mouse anti-TATA binding protein (Abcam, ab51841)  
 mouseRabbit polyclonal anti-CTCF Cell Signaling Technology 2899S  
 Mouse monoclonal anti-CTCF BD Biosciences 612148  
 Mouse monoclonal anti-CTCF Abcam 37477  
 Rabbit polyclonal anti-AHCTF1 Novusbio NBP1-87952  
 Rabbit polyclonal anti-AHCTF1 Novusbio NB600-238  
 Rabbit monoclonal anti-Biotin Cell Signaling Technology 5597S  
 Mouse monoclonal anti-Digoxigenin Roche 11333062910  
 Rabbit polyclonal IgG Cell Signaling Technology 2729S  
 Mouse polyclonal IgG Santa Cruz 2025  
 Rabbit monoclonal anti-NUP133 Abcam 155990  
 Rabbit monoclonal anti- $\beta$ -catenin Cell Signaling Technology 8480S  
 Rabbit monoclonal anti-TCF4 Cell Signaling Technology 2569S

Validation

All antibodies were approved of only if they detected the correct bands upon WES/JESS analyses

## Eukaryotic cell lines

Policy information about [cell lines](#)

Cell line source(s)

The primary cultures of human colon epithelial cells were purchased from ScienCell. The HCT-116 cell line was obtained from professor B Vogelstein and are available commercially at ATCCC (91091005-1VL).

Authentication

The HCT-116 cells used in this study has undergone STR authentication by ATCC

Mycoplasma contamination

The cells were routinely tested for mycoplasma contamination. In no instance have the cells used in this manuscript been compromised by any such infection.

Commonly misidentified lines  
(See [ICLAC](#) register)

No commonly misidentified cell line was used

## ChIP-seq

### Data deposition

 Confirm that both raw and final processed data have been deposited in a public database such as [GEO](#).

 Confirm that you have deposited or provided access to graph files (e.g. BED files) for the called peaks.

Data access links

*May remain private before publication.*

For genomic sequences SRA accession nr: PRJNA756713, for ChIP-seq GEO accession nr: GSE184106 and for RNA-seq data GEO accession nr: GSE184103

Files in database submission

For genomics sequences SRA data accession:

WT: SRR15559958  
 E4: SRR15559959  
 D3: SRR15559960

For RNA-seq data GEO accession:

GSM5577953\_D3\_1.coverage.bw  
 GSM5577954\_E4\_1.coverage.bw  
 GSM5577955\_WT\_1.coverage.bw  
 GSM5577956\_D3\_2.coverage.bw  
 GSM5577957\_E4\_2.coverage.bw

For ChIP-seq data GEO accession:

GSM5577970\_WT\_CTCF\_R1\_peaks.broadPeak.gz  
 GSM5577971\_WT\_CTCF\_R2\_peaks.broadPeak.gz  
 GSM5577972\_WT\_CTCF\_R3\_peaks.broadPeak.gz  
 GSM5577973\_D3\_CTCF\_R1\_peaks.broadPeak.gz  
 GSM5577974\_D3\_CTCF\_R2\_peaks.broadPeak.gz  
 GSM5577975\_D3\_CTCF\_R3\_peaks.broadPeak.gz  
 GSM5577976\_E4\_CTCF\_R1\_peaks.broadPeak.gz  
 GSM5577977\_E4\_CTCF\_R2\_peaks.broadPeak.gz

GSM5577978\_E4\_CTCF\_R3\_peaks.broadPeak.gz

Genome browser session  
(e.g. [UCSC](#))<http://genome-euro.ucsc.edu/s/wushyer/HCT116-ChipSeq-II>

## Methodology

Replicates

All CHIP-seq datasets are derived from 3 biological replicates

Sequencing depth

All the sample is paired-end library with length 2X150 bp with ranging from 19-33Mb reads. Detailed statistics listed below

| Library     | Total_reads | Aligned_reads | Unique_mapQ>30 | Run              | Depth       |
|-------------|-------------|---------------|----------------|------------------|-------------|
| D3_CTCF_R1  | 25826058    | 18593110      | 18449393       | paired-end-150bp | 1.251386191 |
| D3_CTCF_R2  | 20881960    | 14970030      | 14845921       | paired-end-150bp | 1.01182288  |
| D3_CTCF_R3  | 22012936    | 16046778      | 15916588       | paired-end-150bp | 1.066623646 |
| D3_no_ab_R1 | 29906358    | 11435552      | 11251975       | paired-end-150bp | 1.449094687 |
| D3_no_ab_R2 | 19537306    | 10079346      | 9858098        | paired-end-150bp | 0.946668475 |
| D3_no_ab_R3 | 24178546    | 13506178      | 12939964       | paired-end-150bp | 1.171556983 |
| E4_CTCF_R1  | 28904450    | 20556830      | 20388988       | paired-end-150bp | 1.400547834 |
| E4_CTCF_R2  | 22062814    | 15879156      | 15750834       | paired-end-150bp | 1.069040454 |
| E4_CTCF_R3  | 19796104    | 15125694      | 15009827       | paired-end-150bp | 0.959208377 |
| E4_no_ab_R1 | 29791320    | 6964290       | 6811740        | paired-end-150bp | 1.443520589 |
| E4_no_ab_R2 | 25391456    | 16682004      | 16512739       | paired-end-150bp | 1.230327811 |
| E4_no_ab_R3 | 27931148    | 14930008      | 14724067       | paired-end-150bp | 1.353387068 |
| WT_CTCF_R1  | 22838594    | 16532104      | 16398170       | paired-end-150bp | 1.10663041  |
| WT_CTCF_R2  | 24604534    | 17520258      | 17378043       | paired-end-150bp | 1.192197976 |
| WT_CTCF_R3  | 25515504    | 18779954      | 18633393       | paired-end-150bp | 1.236338483 |
| WT_no_ab_R1 | 33021860    | 18003780      | 17826949       | paired-end-150bp | 1.600054473 |
| WT_no_ab_R2 | 22164796    | 12808532      | 12654057       | paired-end-150bp | 1.073981931 |
| WT_no_ab_R3 | 20595282    | 10779816      | 10547569       | paired-end-150bp | 0.997932069 |

Antibodies

CTCF (Cell Signaling Technology; CS 2899S)

Peak calling parameters

BWA was used for reads mapping and Macs2 was used for peak calling. All the command line was implemented in nf-core/chip-seq.1.2.2 with CTCF treated as IP and no antibody as input. The command line is "nextflow run ../software/chipseq-1.2.2/ -profile singularity -with-singularity ../software/nfcore-chipseq.simg --genome GRCh37 --input read.csv --outdir ./0719"

Data quality

MACS2 FRIp score is generated by calculating the fraction of all mapped reads that fall into the MACS2 called peak regions. Phantompeakqualtools was further used to estimate the relatively strand cross-correlation coefficient in all samples.

Library FRIp score Total\_peaks FDR 5% and &gt;5-fold enrichment

|            |          |       |       |
|------------|----------|-------|-------|
| D3_CTCF_R1 | 0.42939  | 57935 | 24535 |
| D3_CTCF_R2 | 0.41517  | 57475 | 24495 |
| D3_CTCF_R3 | 0.393704 | 51715 | 23303 |
| E4_CTCF_R1 | 0.279027 | 39434 | 19611 |
| E4_CTCF_R2 | 0.419365 | 51422 | 20838 |
| E4_CTCF_R3 | 0.434209 | 48235 | 19682 |
| WT_CTCF_R1 | 0.156481 | 38645 | 19045 |
| WT_CTCF_R2 | 0.203918 | 41380 | 20779 |
| WT_CTCF_R3 | 0.170255 | 38655 | 17544 |

Relatively strand cross-correlation coefficient in each library

|             |           |
|-------------|-----------|
| D3_CTCF_R1  | 1.106373  |
| D3_CTCF_R2  | 1.202278  |
| D3_CTCF_R3  | 1.230677  |
| D3_no_ab_R1 | 0.6345716 |
| D3_no_ab_R2 | 0.4524308 |
| D3_no_ab_R3 | 0.2726278 |
| E4_CTCF_R1  | 1.245693  |
| E4_CTCF_R2  | 1.231754  |
| E4_CTCF_R3  | 1.210388  |
| E4_no_ab_R1 | 0.5749267 |
| E4_no_ab_R2 | 0.967061  |
| E4_no_ab_R3 | 0.623728  |
| WT_CTCF_R1  | 1.254182  |
| WT_CTCF_R2  | 1.406901  |
| WT_CTCF_R3  | 1.612281  |
| WT_no_ab_R1 | 1.514352  |
| WT_no_ab_R2 | 1.052192  |
| WT_no_ab_R3 | 0.4194285 |

## Software

Chip-seq data analyses were performed by nf-core/chipseq pipeline (version 1.2.2). Briefly, Trim Galore ([https://www.bioinformatics.babraham.ac.uk/projects/trim\\_galore/](https://www.bioinformatics.babraham.ac.uk/projects/trim_galore/)) was used to trim adapter. BWA was used to perform read alignment. Picard (<http://broadinstitute.github.io/picard>) was used to mark duplicates. BEDTools and bedGraphToBigWig were used create normalized bigWig files. Phantompeakqualtools was used to calculate strand cross-correlation peak and ChIP-seq quality measures. MACS2 was used to call peaks and HOMER was used to perform peak annotation. All the read coverages were visualized by IGV genome browser version 2.5.3. For quantitation of microscopic images Imaris v.8.1.2 was used.
